# Supplementary material for: Substrate Specificity of GSDA Revealed by Cocrystal Structures and Binding Studies
Source: MDPI journal article supplement (doi:10.3390/ijms232314976), 2022-11-29
Supplement: s1 [file s1]

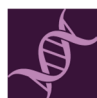

# Supplementary Information

## Substrate Specificity of GSDA Revealed by Cocrystal Structures and Binding Studies

Qian Jia, Jinbing Zhang, Hui Zeng, Jing Tang, Nan Xiao, Shangfang Gao, Huanxi Li and Wei Xie \*

MOE Key Laboratory of Gene Function and Regulation, School of Life Sciences, Sun Yat-sen University, Guangzhou 510006, China

\* Correspondence: xiewei6@mail.sysu.edu.cn

This PDF file includes: Figures S1-S2 and Table S1

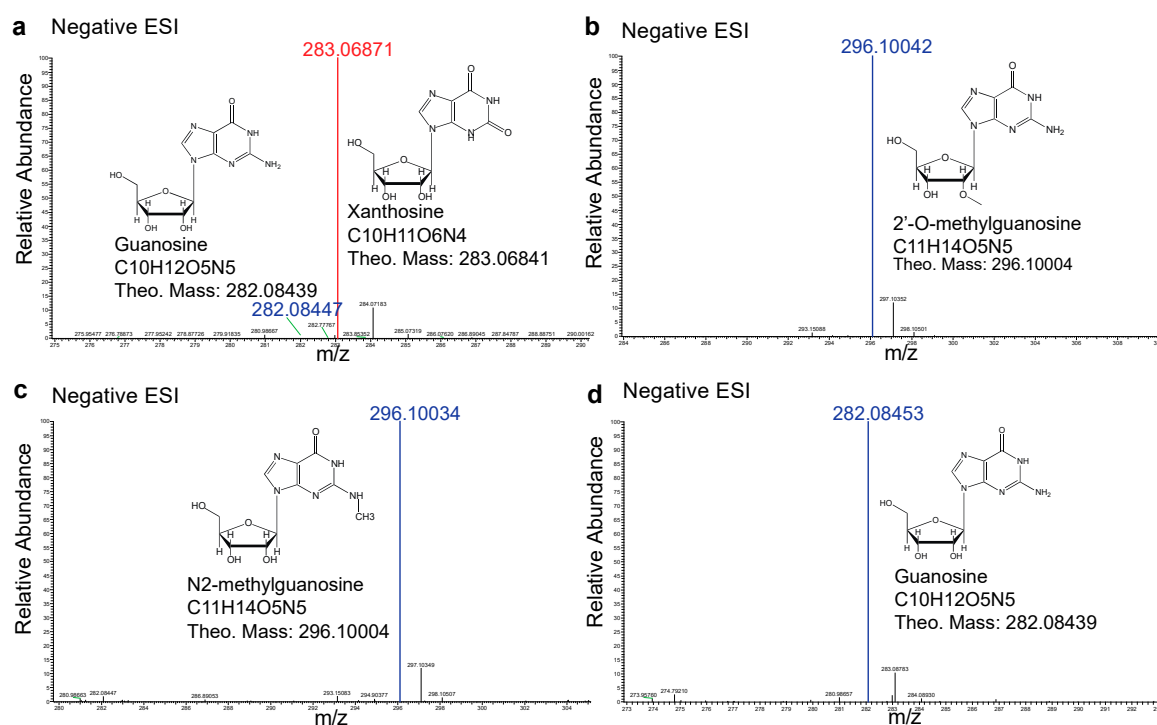

**Figure S1.** The deamination activity tests of AtGSDA and variants, analyzed by the Orbitrap high-resolution mass spectrometry. (a) The 2-hr deamination product by WT-AtGSDA incubation with Gua. (b–d) The 24-hr deamination product by AtGSDA/E82Q incubation with 2'-O-mG (b), with N<sup>2</sup>-mG (c), and with Gua (d), respectively. The blue and red lines indicated the substrates and the products, respectively.

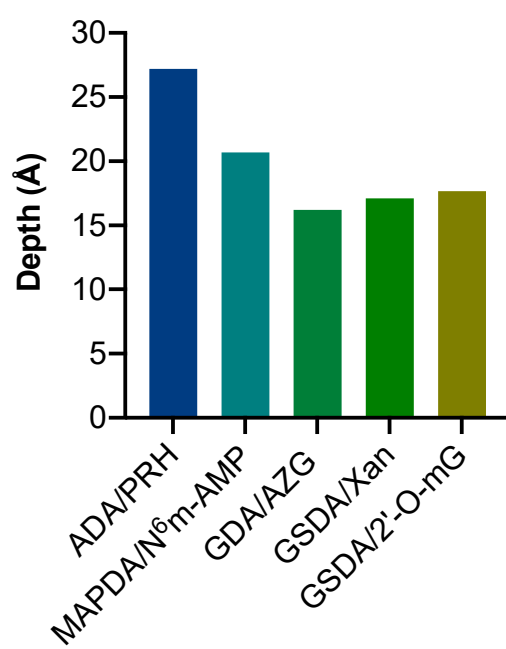

**Figure S2.** The depths of the substrate-binding pockets of several purine-metabolic enzymes. PRH: 6-hydroxy-1,6-dihydropurine riboside, N<sup>6</sup>m-AMP: N<sup>6</sup>-methyl-AMP; AZG: 8-azaguanine; Xan: xanthosine; 2'-O-mG: 2'-O-methylguanosine.

Table S1. Data collection and refinement statistics.

|                                     | WT-Ado (7DCW)                        | WT-Ins (7DCB)                        | WT-2'-O-mG (7DGC)                                             |
|-------------------------------------|--------------------------------------|--------------------------------------|---------------------------------------------------------------|
| <b>Data collection</b>              |                                      |                                      |                                                               |
| Space group                         | $P6_1$                               | $P6_1$                               | $P6_1$                                                        |
| Cell dimensions                     |                                      |                                      |                                                               |
| $a, b, c$ (Å)                       | 119.08, 119.08, 39.69                | 117.98, 117.98, 37.74                | 119.05, 119.05, 39.81                                         |
| $\alpha, \beta, \gamma$ (°)         | 90, 90, 120                          | 90, 90, 120                          | 90, 90, 120                                                   |
| Resolution (Å)                      | 21.63-2.30 (2.42-2.30)*              | 50-2.00 (2.07-2.00)*                 | 50-2.10 (2.18-2.10)*                                          |
| $R_{\text{merge}}$                  | 0.24 (0.93)                          | 0.22 (0.76)                          | 0.24 (0.90)                                                   |
| $I/\sigma I$                        | 10.5 (2.6)                           | 19.2 (2.5)                           | 19.1 (2.1)                                                    |
| Completeness (%)                    | 99.9 (100)                           | 99.5 (97.5)                          | 99.9 (98.8)                                                   |
| Multiplicity                        | 8.3 (6.8)                            | 18.6 (13.8)                          | 16.9 (10.0)                                                   |
| <b>Refinement</b>                   |                                      |                                      |                                                               |
| Resolution (Å)                      | 21.64-2.30 (2.48-2.30)               | 34.06-2.00 (2.10-2.00)               | 31.51-2.11 (2.22-2.11)                                        |
| No. reflections                     | 14606                                | 20493                                | 18950                                                         |
| $R_{\text{work}} / R_{\text{free}}$ | 17.8/22.1                            | 16.5/19.8                            | 18.3/21.9                                                     |
| No. atoms                           |                                      |                                      |                                                               |
| Protein                             | 2358                                 | 2359                                 | 2373                                                          |
| Ligand/ion                          | 2 (Zn <sup>2+</sup> ), 38 (ADN)      | 2 (Zn <sup>2+</sup> ), 38 (NOS)      | 2 (Zn <sup>2+</sup> ), 42 (M2X), 1(Na <sup>+</sup> )          |
| Water                               | 159                                  | 132                                  | 133                                                           |
| $B$ -factors                        |                                      |                                      |                                                               |
| Protein                             | 22.8                                 | 33.9                                 | 36.6                                                          |
| Ligand/ion                          | 15.6 (Zn <sup>2+</sup> ), 20.5 (ADN) | 25.7 (Zn <sup>2+</sup> ), 34.3 (NOS) | 27.8 (Zn <sup>2+</sup> ), 42.0 (M2X), 52.8 (Na <sup>+</sup> ) |
| Water                               | 24.9                                 | 38.8                                 | 40.5                                                          |
| R.m.s. deviations                   |                                      |                                      |                                                               |
| Bond lengths (Å)                    | 0.003                                | 0.004                                | 0.002                                                         |
| Bond angles (°)                     | 0.58                                 | 0.68                                 | 0.48                                                          |
| Ramachandran favored (%)            | 96.8                                 | 97.1                                 | 97.7                                                          |
| Outliers (%)                        | 0.32                                 | 0.00                                 | 0.00                                                          |

|                                                     | WT-N <sup>2</sup> -mG (7DH1)         | WT-isoG (7DM6)                       | E82Q-2'-O-mG (7W1Q)                  |
|-----------------------------------------------------|--------------------------------------|--------------------------------------|--------------------------------------|
| <b>Data collection</b>                              |                                      |                                      |                                      |
| Space group                                         | <i>P</i> 6 <sub>1</sub>              | <i>P</i> 6 <sub>1</sub>              | <i>P</i> 6 <sub>1</sub>              |
| Cell dimensions                                     |                                      |                                      |                                      |
| <i>a</i> , <i>b</i> , <i>c</i> (Å)                  | 118.78, 118.78, 39.54                | 118.79, 118.79, 39.63                | 119.24, 119.24, 39.01                |
| $\alpha$ , $\beta$ , $\gamma$ (°)                   | 90, 90, 120                          | 90, 90, 120                          | 90, 90, 120                          |
| Resolution (Å)                                      | 50-1.92 (1.92-1.85)*                 | 23.77-2.05 (2.16-2.05)*              | 23.69-2.30 (2.42-2.30)*              |
| <i>R</i> <sub>merge</sub>                           | 0.12 (0.74)                          | 0.11 (0.38)                          | 0.52 (1.94)                          |
| <i>I</i> / $\sigma$ <i>I</i>                        | 28 (2.3)                             | 17.6 (6.2)                           | 15.0 (1.1)                           |
| Completeness (%)                                    | 99.6 (95.6)                          | 99.9 (100)                           | 99.9 (100)                           |
| Multiplicity                                        | 19.3 (16.3)                          | 9.4 (9.7)                            | 9.1 (7.5)                            |
| <b>Refinement</b>                                   |                                      |                                      |                                      |
| Resolution (Å)                                      | 31.35-1.85 (1.92-1.85)               | 23.77-2.05 (2.16-2.05)               | 23.69-2.30 (2.48-2.30)               |
| No. reflections                                     | 27450                                | 20365                                | 14356                                |
| <i>R</i> <sub>work</sub> / <i>R</i> <sub>free</sub> | 16.3/19.9                            | 17.2/20.0                            | 21.1/23.8                            |
| No. atoms                                           |                                      |                                      |                                      |
| Protein                                             | 2378                                 | 2368                                 | 2376                                 |
| Ligand/ion                                          | 2 (Zn <sup>2+</sup> ), 40 (4UO)      | 2 (Zn <sup>2+</sup> ), 40 (ISG)      | 2 (Zn <sup>2+</sup> ), 21 (2MG)      |
| Water                                               | 196                                  | 228                                  | 128                                  |
| <i>B</i> -factors                                   |                                      |                                      |                                      |
| Protein                                             | 32.6                                 | 19.7                                 | 27.9                                 |
| Ligand/ion                                          | 24.4 (Zn <sup>2+</sup> ), 31.5 (4UO) | 11.6 (Zn <sup>2+</sup> ), 18.8 (ISG) | 19.0 (Zn <sup>2+</sup> ), 35.9 (2MG) |
| Water                                               | 39.20                                | 27.00                                | 28.87                                |
| R.m.s. deviations                                   |                                      |                                      |                                      |
| Bond lengths (Å)                                    | 0.014                                | 0.003                                | 0.006                                |
| Bond angles (°)                                     | 1.25                                 | 0.53                                 | 0.88                                 |
| Ramachandran favored (%)                            | 97.4                                 | 97.1                                 | 97.7                                 |
| Outliers (%)                                        | 0.00                                 | 0.32                                 | 0.00                                 |

|                                    | WT-Gua (7DM5)                        | Y185F-Gua (7DQN)                     |
|------------------------------------|--------------------------------------|--------------------------------------|
| <b>Data collection</b>             |                                      |                                      |
| Space group                        | $P6_1$                               | $P6_1$                               |
| Cell dimensions                    |                                      |                                      |
| <i>a</i> , <i>b</i> , <i>c</i> (Å) | 118.57, 118.57, 39.41                | 119.17, 119.17, 39.48                |
| $\alpha$ , $\beta$ , $\gamma$ (°)  | 90, 90, 120                          | 90, 90, 120                          |
| Resolution (Å)                     | 23.56-2.20 (2.32-2.20)*              | 23.78-2.60 (2.74-2.60)*              |
| $R_{merge}$                        | 0.11 (0.32)                          | 0.16 (0.61)                          |
| $I/\sigma I$                       | 15.1 (5.9)                           | 12.1 (3.7)                           |
| Completeness (%)                   | 99.9 (100)                           | 99.9 (100)                           |
| Multiplicity                       | 6.9 (7.1)                            | 6.9 (7.1)                            |
| <b>Refinement</b>                  |                                      |                                      |
| Resolution (Å)                     | 23.56-2.20 (2.34-2.20)               | 23.78-2.60 (2.98-2.60)               |
| No. reflections                    | 16349                                | 10089                                |
| $R_{work}$ / $R_{free}$            | 16.7/22.2                            | 16.6/22.1                            |
| No. atoms                          |                                      |                                      |
| Protein                            | 2390                                 | 2357                                 |
| Ligand/ion                         | 2 (Zn <sup>2+</sup> ), 40 (4UO)      | 2 (Zn <sup>2+</sup> ), 20 (GMP)      |
| Water                              | 197                                  | 92                                   |
| <i>B</i> -factors                  |                                      |                                      |
| Protein                            | 20.9                                 | 27.6                                 |
| Ligand/ion                         | 12.5 (Zn <sup>2+</sup> ), 20.1 (4UO) | 21.4 (Zn <sup>2+</sup> ), 31.5 (GMP) |
| Water                              | 26.1                                 | 28.0                                 |
| R.m.s. deviations                  |                                      |                                      |
| Bond lengths (Å)                   | 0.003                                | 0.003                                |
| Bond angles (°)                    | 0.55                                 | 0.56                                 |
| Ramachandran favored (%)           | 97.4                                 | 97.7                                 |
| Outliers (%)                       | 0.00                                 | 0.00                                 |

\*Values in parentheses are for highest-resolution shell. Each dataset was collected from a single crystal. Acronyms: Gua (GMP): guanosine; Xan (4UO): xanthosine; Ado (ADN): adenosine; Ins (NOS): inosine; 2'-O-mG (2MG): 2'-O-methylguanosine; M2X: 2'-O-methylxanthosine; N<sup>2</sup>-mG: N<sup>2</sup>-methylguanosine; isoG (ISG): isoguanosine. The codes in the parentheses were the three-letter designations for the ligands used for the PDB database.
